# Supplementary material for: Establishment of a birth-to-education cohort of 1 million Palestinian refugees using electronic medical records and electronic education records
Source: PubMed Central journal article supplement — Int J Popul Data Sci. 2023 Oct 23;8(1):2156. doi: 10.23889/ijpds.v8i1.2156 (PMC10898319; doi:10.23889/ijpds.v8i1.2156), 2023-10-23

Appendix Table 1: Hypotheses

| Hypotheses                                                                  |                                                                                                                                                                                                                                             |                                     | Link  | Unlinked |
|-----------------------------------------------------------------------------|---------------------------------------------------------------------------------------------------------------------------------------------------------------------------------------------------------------------------------------------|-------------------------------------|-------|----------|
| <b>Structural (legitimate) reasons for data not to link</b>                 |                                                                                                                                                                                                                                             |                                     |       |          |
| <b>Early mortality</b> (before the child used UNRWA services or got an MFN) |                                                                                                                                                                                                                                             |                                     |       |          |
| 1                                                                           | More deaths among the unlinked                                                                                                                                                                                                              | Mortality                           | 0.3%  | 6.0%     |
| 2                                                                           | More multiples among the unlinked because they have higher early mortality (even if one or both are not registered as a death)                                                                                                              | Multiple                            | 1.4%  | 4.4%     |
| 3                                                                           | More LBW/PT among the unlinked because LBW/PT have higher early mortality (even if not registered as a death)                                                                                                                               | Preterm (Gestational age <37 weeks) | 7.7%  | 10.9%    |
|                                                                             |                                                                                                                                                                                                                                             | Low Birthweight (<2500)             | 5.6%  | 9.3%     |
| <b>Child used other services</b> (and never used UNRWA services)            |                                                                                                                                                                                                                                             |                                     |       |          |
| 4                                                                           | More mothers who are not Palestinian among the unlinked because non-refugee mothers have alternative options for child health and education                                                                                                 | Mother RRIS missing in health       | 2.5%  | 10.3%    |
| 5                                                                           | More children with a missing MFN (in the mother dataset) are unlinked because children did not use UNRWA services, so a C MFN was not generated                                                                                             | Missing C MFN                       | 0.0%  | 49.7%    |
| 6.a                                                                         | More families from Jordan and West Bank are unlinked mother and child (because they have more choices). Lebanon, Gaza, and Syria have fewer choices for other services <i>6ca</i> and ( <i>6a</i> or <i>6b</i> ) for in opposite directions | % Linkage health                    |       |          |
|                                                                             |                                                                                                                                                                                                                                             | Jordan                              | 74.8% | 25.2%    |
|                                                                             |                                                                                                                                                                                                                                             | Lebanon                             | 89.1% | 10.9%    |
|                                                                             |                                                                                                                                                                                                                                             | Syria                               | 67.8% | 32.2%    |
|                                                                             |                                                                                                                                                                                                                                             | West Bank                           | 72.8% | 27.2%    |
| 6b                                                                          | More children in Jordan, West Bank do not link to education services because they have more alternative options. Lebanon, Gaza and Syria have fewer choices for other education services                                                    | % Link education                    |       |          |
|                                                                             |                                                                                                                                                                                                                                             | Jordan                              | 31.9% | 68.1%    |
|                                                                             |                                                                                                                                                                                                                                             | Lebanon                             | 63.5% | 36.5%    |
|                                                                             |                                                                                                                                                                                                                                             | Syria                               | 72.2% | 27.8%    |
|                                                                             |                                                                                                                                                                                                                                             | West Bank                           | 32.6% | 67.4%    |
| 6.c.                                                                        | More families from Lebanon and Syria are unlinked (because they have higher migration). Cannot test but might contribute to a higher proportion of unlinked. <i>Cannot be distinguished from other causes in 4.a.</i>                       | Gaza                                | 77.1% | 22.9%    |
|                                                                             |                                                                                                                                                                                                                                             |                                     |       |          |
|                                                                             |                                                                                                                                                                                                                                             |                                     |       |          |
|                                                                             |                                                                                                                                                                                                                                             |                                     |       |          |
|                                                                             |                                                                                                                                                                                                                                             |                                     |       |          |
| <b>Migration</b> (before the child used UNRWA services or got an MFN)       |                                                                                                                                                                                                                                             |                                     |       |          |
| 6.c.                                                                        | More families from Lebanon and Syria are unlinked (because they have higher migration). Cannot test but might contribute to a higher proportion of unlinked. <i>Cannot be distinguished from other causes in 4.a.</i>                       |                                     |       |          |

Continued

Appendix Table 1: Continued

**Lack of linkage due to reporting, recording or data entry errors****Data entry errors in any of the IDs (namely Mother/ C MFN, FRRIS.....)**

|   |                                                                                       |                                              |
|---|---------------------------------------------------------------------------------------|----------------------------------------------|
| 7 | Linkage will improve over time as experience with electronic medical records improved | Figure 5 and Figure 6-Improvement of linkage |
| 8 | Very recent data has more zero in CRRIS as it takes more time to register them        | %Missing C RRIS                              |
|   |                                                                                       | 2010 2.0%                                    |
|   |                                                                                       | 2012 3.8%                                    |
|   |                                                                                       | 2014 5.7%                                    |
|   |                                                                                       | 2016 8.8%                                    |
|   |                                                                                       | 2018 12.0%                                   |
|   |                                                                                       | 2020 38.9%                                   |

**Ages mis-recorded/ recorded approximately (heaped on 1 or 15<sup>th</sup> or in January)**

|   |                                                                                    |                                               |
|---|------------------------------------------------------------------------------------|-----------------------------------------------|
| 9 | Linkage based on steps +/- 90 and +/- 180 will decrease                            | Figure 5- decrease in linkage errors          |
| 7 | Linkage will improve over time as expertise in electronic medical records improved | Figure 5 and Figure 6- Improvement of linkage |

**Sex mis-recorded**

|    |                                           |                    |             |
|----|-------------------------------------------|--------------------|-------------|
| 10 | Attempt to link unlinked kids to any sex. | A total of 13,683. | Error 1.4 % |
|----|-------------------------------------------|--------------------|-------------|

**Location mis-recorded**

|    |                                               |                                   |
|----|-----------------------------------------------|-----------------------------------|
| 11 | Attempt to link unlinked kids to any location | A total of 477 links. Error 0.05% |
|----|-----------------------------------------------|-----------------------------------|

**Live birth miscoded as stillbirth (so was excluded from the start)**

|    |                                                  |                                   |
|----|--------------------------------------------------|-----------------------------------|
| 12 | Attempt to link unlinked children to stillbirths | A total of 56 links. Error 0.006% |
|----|--------------------------------------------------|-----------------------------------|

**Stillbirth miscoded as a live birth**

Cannot test Might be like step 12

**Distinguishing of duplicated records from multiples**

|    |                                       |                                                                                                                                                                                                                                                                                                                                                                                                                           |
|----|---------------------------------------|---------------------------------------------------------------------------------------------------------------------------------------------------------------------------------------------------------------------------------------------------------------------------------------------------------------------------------------------------------------------------------------------------------------------------|
| 13 | The percentage of same-sex multiples. | The sex ratio observed in the data is 1.03 male (50.7%) to 1 female (49.3%). In our dataset same sex multiples (69%); discordant multiples are 31%. This 69% is plausible if we assume that ~30% of multiples are monozygotic (so same sex as per published reports) and around half of dizygotic multiples are same sex ( $0.3 + (0.7(0.5068^2 + 0.4932^2)) = 0.30 + 0.35 = 65.0%$ of multiples expected to be same sex. |
|----|---------------------------------------|---------------------------------------------------------------------------------------------------------------------------------------------------------------------------------------------------------------------------------------------------------------------------------------------------------------------------------------------------------------------------------------------------------------------------|

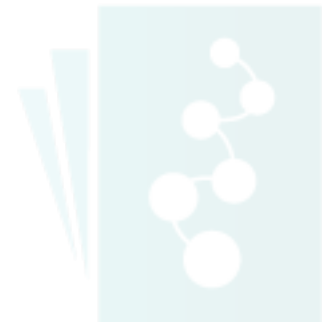

Appendix Table 2: Multivariable logistic regression model of the association of different population characteristics of children using UNRWA services and odds of linkage (N = 892,801)

|                                           |                                                                                                | <b>Adjusted OR (95%CI)</b> |
|-------------------------------------------|------------------------------------------------------------------------------------------------|----------------------------|
| <b>Setting</b>                            | Gaza (ref)                                                                                     | 1.0                        |
|                                           | Jordan                                                                                         | 3.2 (3.1-3.2)              |
|                                           | Lebanon                                                                                        | 1.4 (1.3-1.4)              |
|                                           | Syria                                                                                          | 4.3 (4.2-4.4)              |
|                                           | West Bank                                                                                      | 2.4 (2.3-2.4)              |
| <b>Mother ID</b>                          | Refugee (ref)                                                                                  | 1.0                        |
|                                           | Not a refugee                                                                                  | 2.7 (2.6-2.8)              |
| <b>Dead or at risk of early mortality</b> | Normal birth weight, term and singleton and not recorded as dead (ref)                         | 1.0                        |
|                                           | Low birthweight, or preterm or multiple, and not recorded as dead (at risk of early mortality) | 1.6 (1.6-1.6)              |
|                                           | Recorded as dead                                                                               | 47.0 (44.8-49.3)           |
| <b>Year of birth</b>                      | 2010                                                                                           | 1.0                        |
|                                           | 2011                                                                                           | 0.8 (0.8-0.8)              |
|                                           | 2012                                                                                           | 0.6 (0.5-0.6)              |
|                                           | 2013                                                                                           | 0.4 (0.4-0.4)              |
|                                           | 2014                                                                                           | 0.4 (0.4-0.4)              |
|                                           | 2015                                                                                           | 0.3 (0.3-0.3)              |
|                                           | 2016                                                                                           | 0.3 (0.3-0.3)              |
|                                           | 2017                                                                                           | 0.2 (0.2-0.2)              |
|                                           | 2018                                                                                           | 0.2 (0.2-0.2)              |
|                                           | 2019                                                                                           | 0.2 (0.2-0.2)              |
|                                           | 2020                                                                                           | 0.2 (0.2-0.2)              |

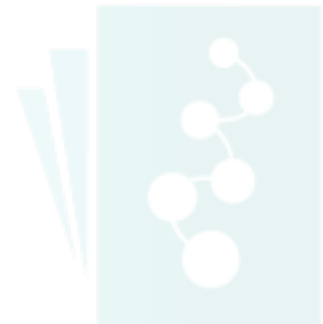

Supplement: ijpds-08-2156-s001.pdf [file ijpds-08-2156-s001.pdf]
